# Supplementary material for: The Response Shift in Quality of Life Assessment among Patients with End-Stage Renal Disease: A Systematic Review
Source: Research Square preprint supplement (doi:10.21203/rs.3.rs-207108/v1), 2021-05-13
Supplement: Supplementary file 1 [file 018fb0211f1e1ee906791022.docx]

**Additional file 1** Search strategy

**PubMed Search Strategy (MeSH terms adjusted for other databases as appropriate)**

1. (end stage[Text Word] OR end-stage[Text Word]) AND (renal[Text Word] OR kidney[Text Word])
2. esrd[Title/Abstract] OR eskd[Title/Abstract] OR esrf[Title/Abstract] OR  crf[Title/Abstract] OR crd[Title/Abstract] OR ckf[Title/Abstract] OR ckd[Title/Abstract]
3. renal replacement therapy[MeSH Terms]
4. kidney transplantation[MeSH Terms]
5. renal dialysis[MeSH Terms]
6. hemodialysis, home[MeSH Terms]
7. hemodialysis unit, hospital[MeSH Terms]
8. dialysis, peritoneal[MeSH Terms]
9. continuous ambulatory peritoneal dialysis[MeSH Terms]
10. (kidney[Title/Abstract] OR renal[Title/Abstract]) AND replacement[Title/Abstract] AND therap*[Title/Abstract]
11. (kidney[Title/Abstract] OR renal[Title/Abstract]) AND transplant*[Title/Abstract]
12. hemofiltration[Title/Abstract] OR haemofiltration[Title/Abstract] OR hemodiafiltration[Title/Abstract] OR haemodiafiltration [Title/Abstract]
13. HD[Title/Abstract] OR PD[Title/Abstract] OR APD[Title/Abstract] OR CAPD[Title/Abstract] OR CCPD[Title/Abstract] OR KT[Title/Abstract] OR Tx[Title/Abstract] OR RRT[Title/Abstract]
14. #1 OR #2 OR #3 OR #4 OR #5 OR #6 OR#7 OR #8 OR #9 OR #10 OR #11 OR #12 OR #13
15. “Response shift”[Title/Abstract] OR recalibration[Title/Abstract] OR reprioritization[Title/Abstract] OR reconceptualization[Title/Abstract]
16. case reports[Publication Type] OR letter[Publication Type] OR editorial[Publication Type] OR review[Publication Type] OR commentary[Publication Type] OR congress abstract[Publication Type]
17. #14 AND #15
18. #17 NOT #16
19. #18 AND English[Language]
